# Supplementary material for: Porous aluminum decorated with rhodium nanoparticles: preparation and use as a platform for UV SERS
Source: Royal Society of Chemistry journal article supplement (doi:10.1039/d4ma00203b), 2024-01-01
Supplement: d4ma00203b1.pdf [file d4ma00203b1.pdf]

## SUPPORTING INFORMATION

### Porous aluminium decorated with rhodium nanoparticles – preparation and use as platform for UV SERS

Shrobona Banerjee<sup>a,b</sup>, Luca Mattarozzi<sup>c</sup>, Nicolò Macceferri<sup>d</sup>, Sandro Cattarin<sup>e</sup>, Shukun Weng<sup>a</sup>, Ali Douaki<sup>a</sup>, German Lanzavecchia<sup>a</sup>, Anastasiia Sapunova<sup>a</sup>, Francesco D'Amico<sup>e</sup>, Qifei Ma<sup>a,g</sup>, Yanqiu Zou<sup>a,h</sup>, Roman Krahn<sup>a</sup>, Janina Kneipp<sup>b</sup> and Denis Garoli<sup>a,f,g\*</sup>

- 
- a.* Istituto Italiano di Tecnologia, via Morego 30, I-16163, Genova, Italy;  
*b.* Humboldt-Universität zu Berlin, Brook-Taylor-Straße 2, 12489 Berlin, Germany  
*c.* ICMATE - CNR, Corso Stati Uniti 4, 35127 Padova, Italy;  
*d.* Department of Physics, Umeå University, Linnaeus väg 24, 901 87 Umeå, Sweden  
*e.* Elettra Sincrotrone Trieste S.C.p.A., S.S. 14 km 163,5 in Area Science Park, 34149, Basovizza (TS), Italy  
*f.* Dipartimento di Scienze e Metodi dell'Ingegneria, Università degli Studi di Modena e Reggio Emilia, Via Amendola 2, 42122, Reggio Emilia (Italy)  
*g.* College of Optical and Electronic Technology, China Jiliang University, Hangzhou 310018, China  
*h.* State Key Laboratory of Modern Optical Instrumentation, College of Optical Science and Engineering, Zhejiang University, Hangzhou 310027, China
- 

\*Corresponding Authors: [denis.garoli@unimore.it](mailto:denis.garoli@unimore.it);

#### Supporting Note #1 – Additional SEM micrographs

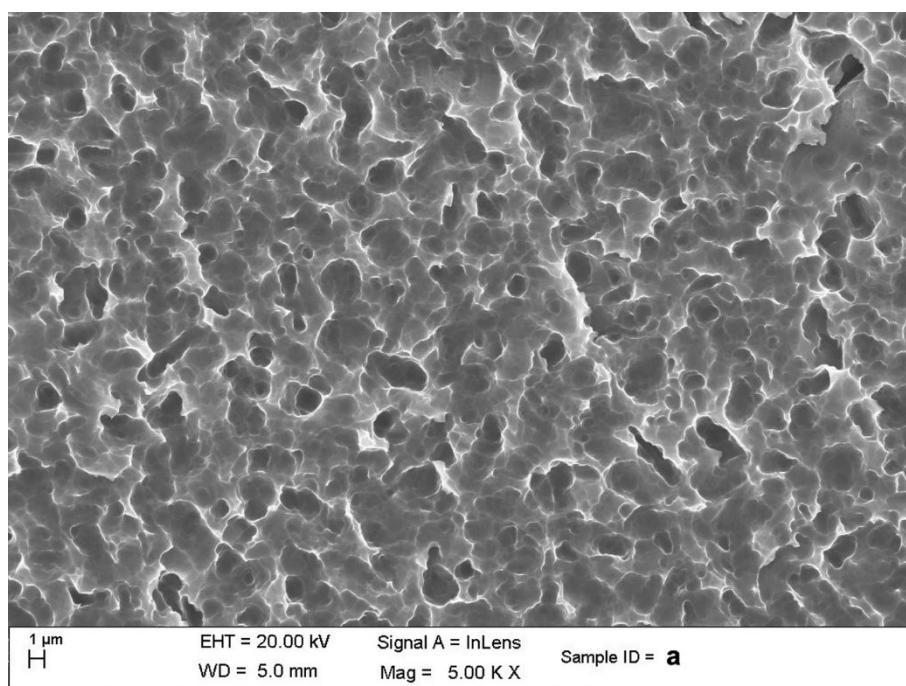

Fig. S1. SEM micrograph of the prepared sample (a)

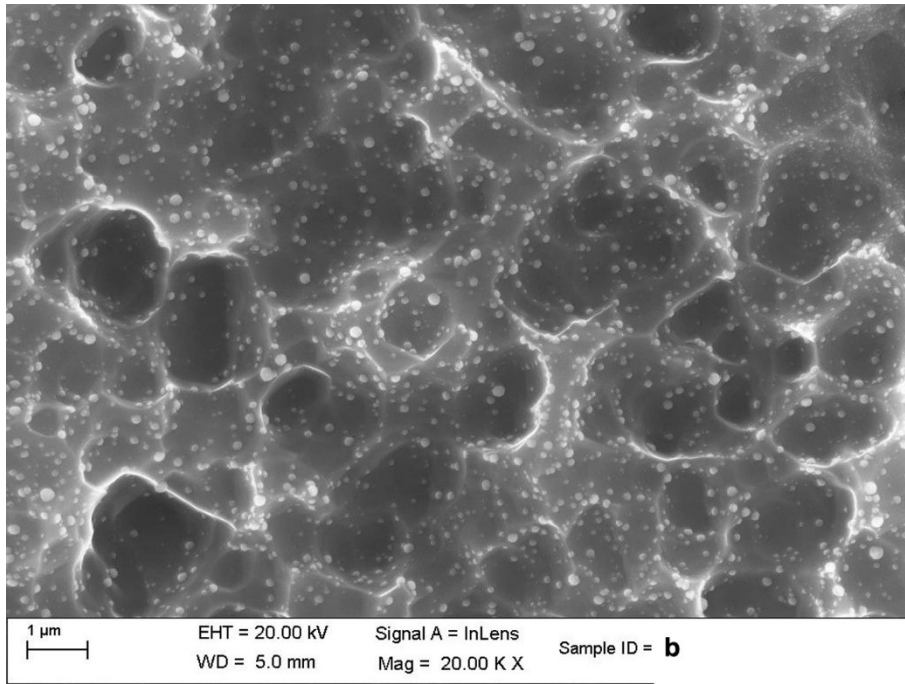

**Fig. S2.** SEM micrograph of the prepared sample (b)

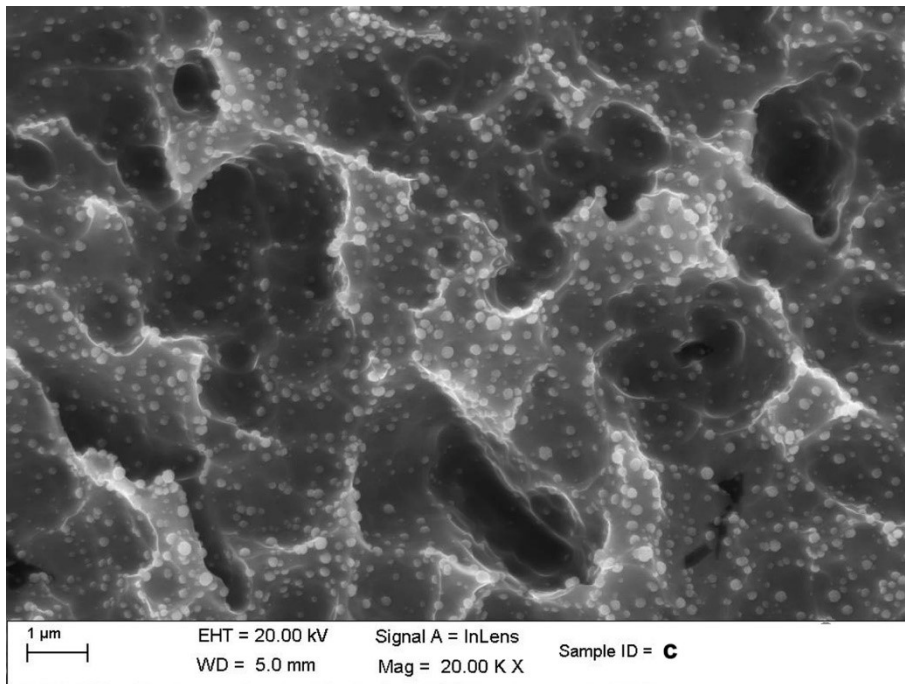

**Fig. S3.** SEM micrograph of the prepared sample (c)

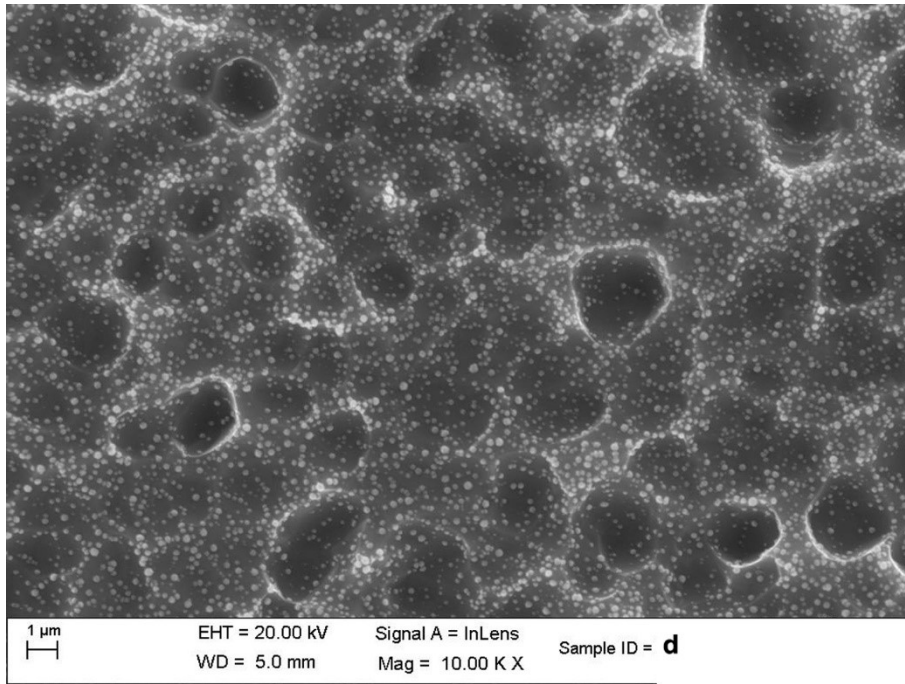

**Fig. S4.** SEM micrograph of the prepared sample (d)

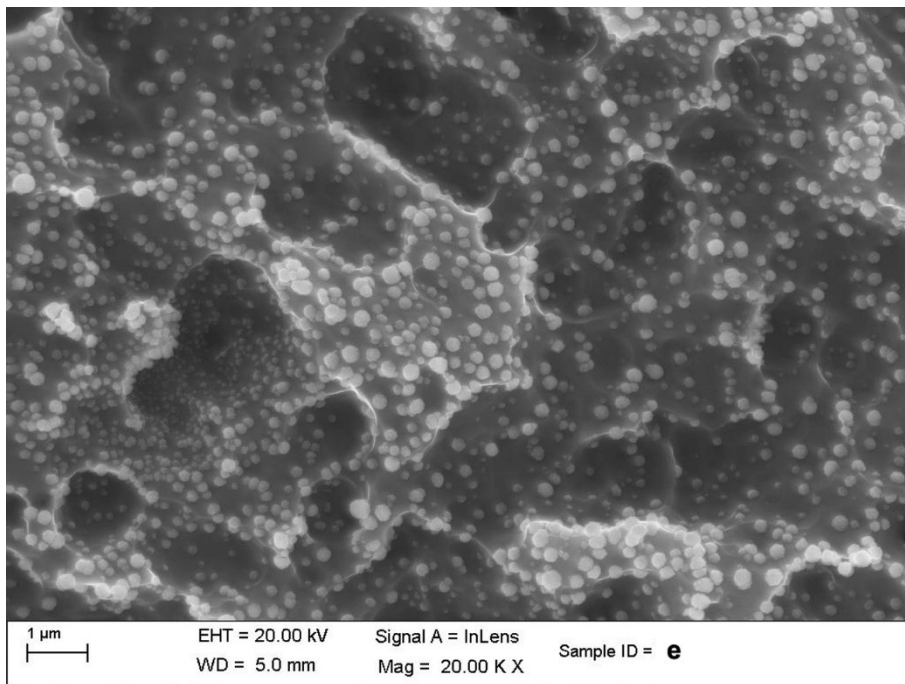

**Fig. S5.** SEM micrograph of the prepared sample (e)

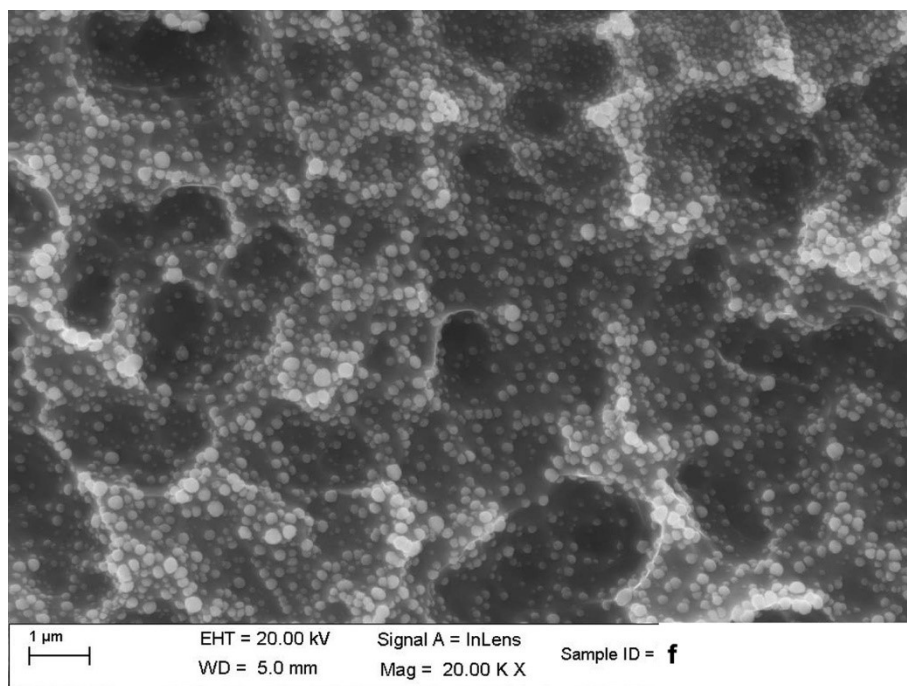

Fig. S6. SEM micrograph of the prepared sample (f)

### Supporting Note #2 – AFM Maps

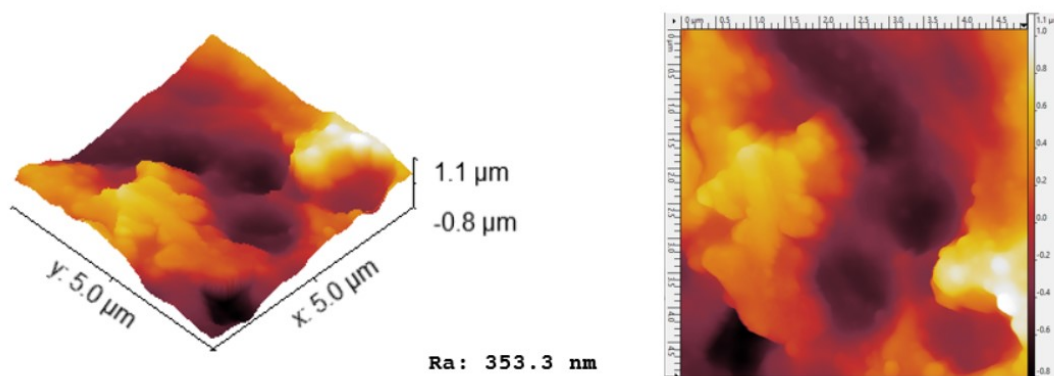

Fig. S7. AFM map of the prepared sample (b)

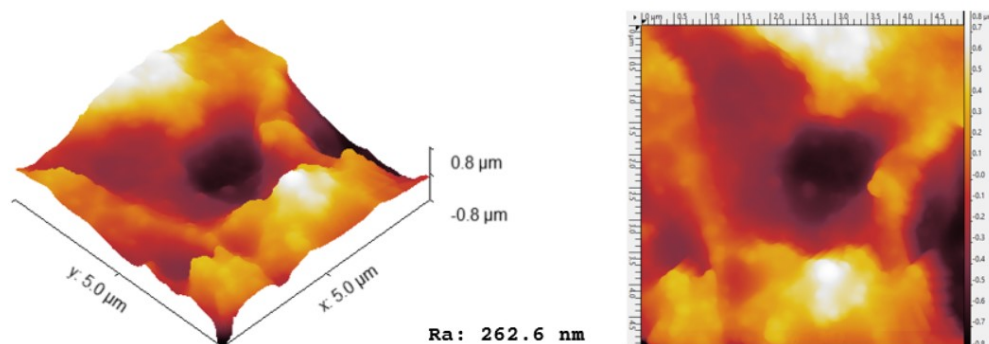

**Fig. S8.** AFM map of the prepared sample (c)

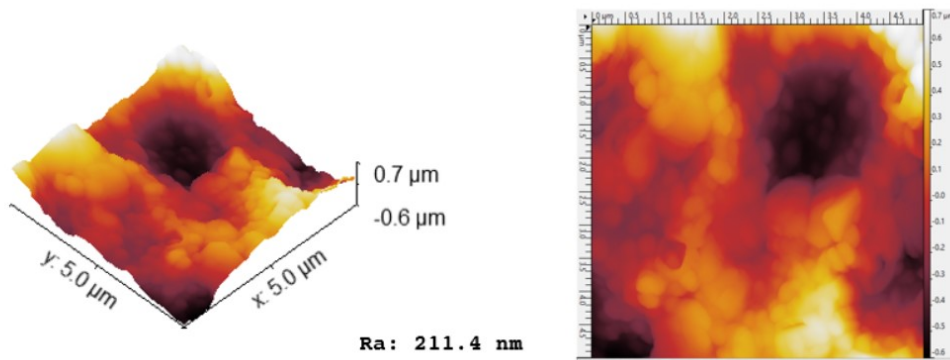

**Fig. S9.** AFM map of the prepared sample (d)

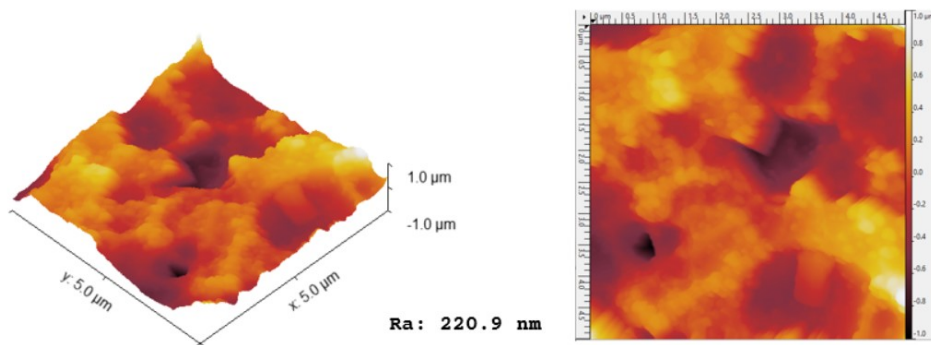

**Fig. S10.** AFM map of the prepared sample (e)

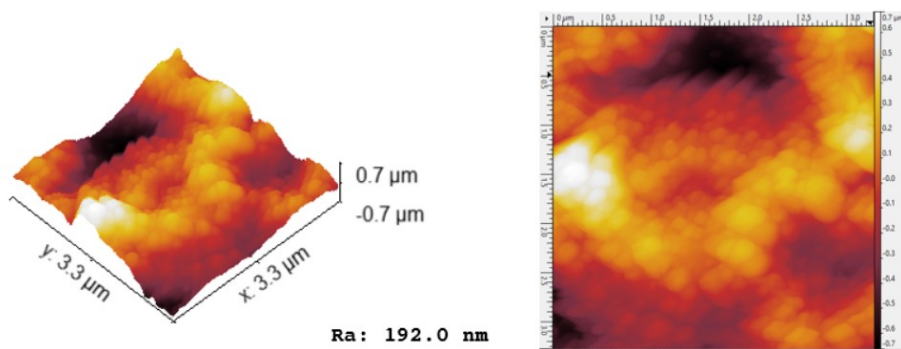

**Fig. S11.** SEM micrograph of the prepared sample (f)

### Supporting Note #3 – Reflectance Spectra

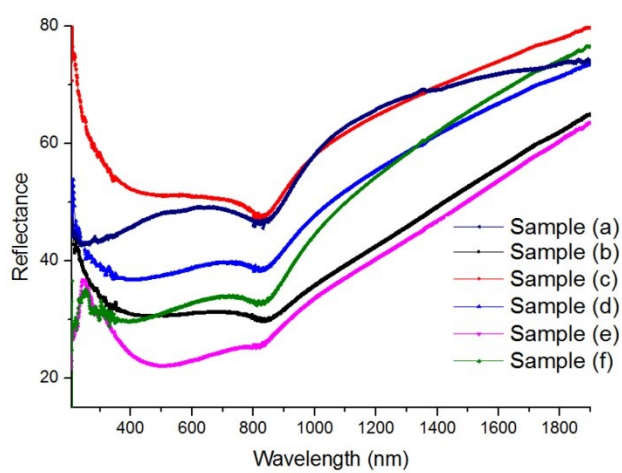

**Fig. S12.** Total Reflectance spectra of the samples.

### Supporting Note #4 – Additional FEM simulations

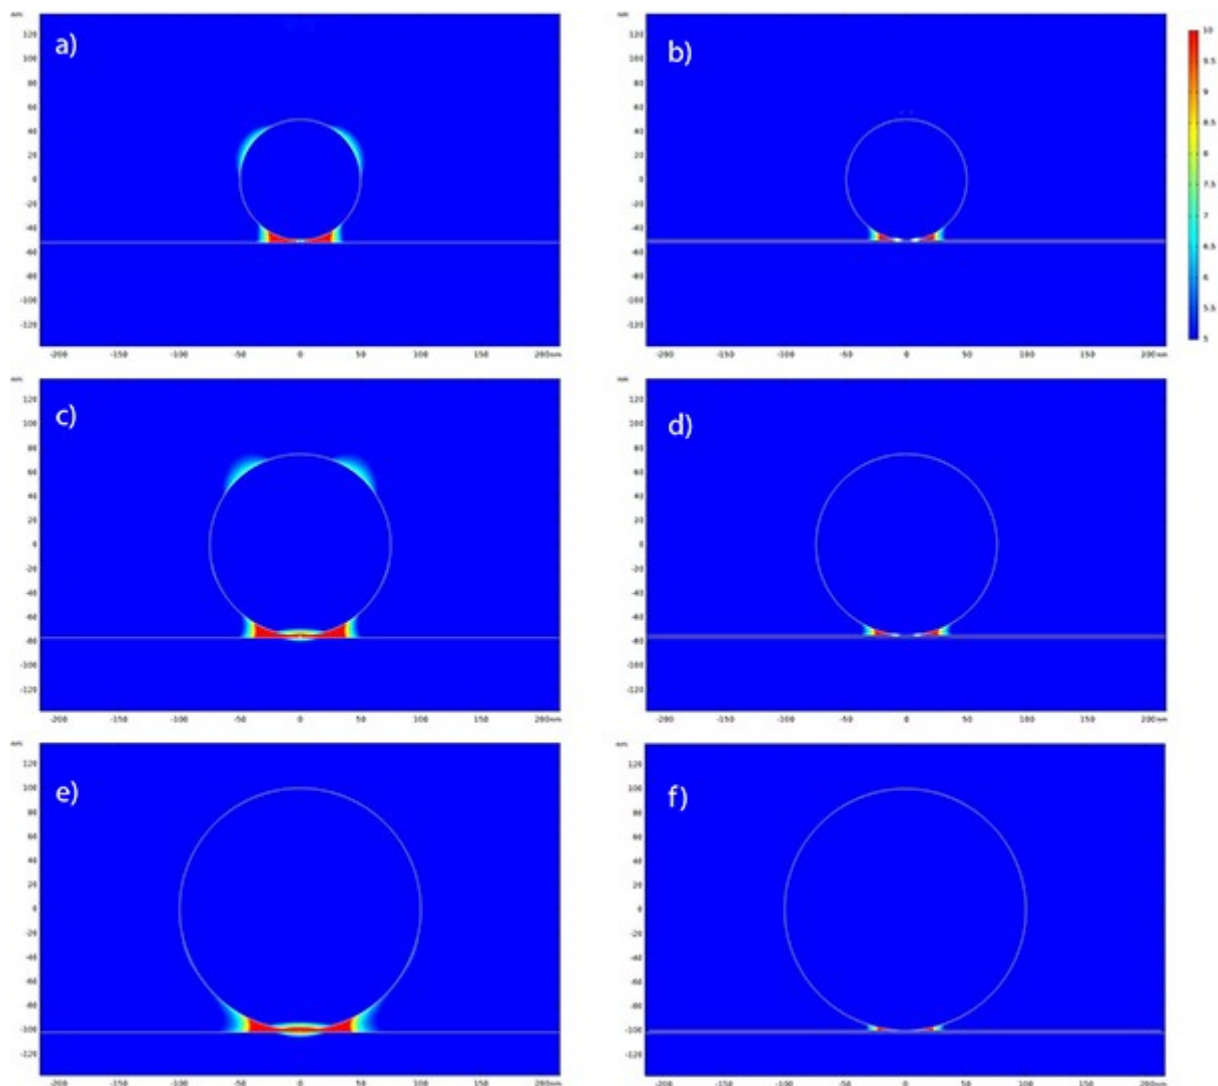

**Fig. S13.** FEM simulations of a Rh nanoparticle deposited on an Al film. Excitation wavelength 266 nm (illumination from the top). Electromagnetic field enhancement factor. (a) Rh nanoparticle with a diameter of 100 nm; (b) Rh nanoparticle with a diameter of 100 nm on a film of Al considering an additional 2 nm Al<sub>2</sub>O<sub>3</sub> layer in the gap; (c) Rh nanoparticle with a diameter of 150 nm; (d) Rh nanoparticle with a diameter of 150 nm on a film of Al considering an additional 2 nm Al<sub>2</sub>O<sub>3</sub> layer in the gap; (e) Rh nanoparticle with a diameter of 200 nm; (f) Rh nanoparticle with a diameter of 200 nm on a film of Al considering an additional 2 nm Al<sub>2</sub>O<sub>3</sub> layer in the gap.
